# Supplementary material
Source: PubMed Central journal article supplement (PMC7526949)
Supplement: ry200443suppa1.pdf [file ry200443suppa1.pdf]

**Table E1. Characteristics of the studies included in the meta-analysis**

| First author (year)    | Study design                                             | Follow-up periods (months) | Response criteria | Definition of PsP                                                                                                                                                                                                                                | Category of PsP           | Tumor*   | Agent(s)   | Total no. of patients | No. of patients with PsP |
|------------------------|----------------------------------------------------------|----------------------------|-------------------|--------------------------------------------------------------------------------------------------------------------------------------------------------------------------------------------------------------------------------------------------|---------------------------|----------|------------|-----------------------|--------------------------|
| Wolchok et al (2009)   | Pooled analysis of two trials (NCT00289627, NCT00289640) | NA                         | irRC              | Among patients with WHO PD, patients with irPR and irSD on irRC                                                                                                                                                                                  | PD-irSD/PR/CR on irRC     | Melanoma | Ipilimumab | 227                   | 22 (9.7%) <sup>a</sup>   |
| Topalian et al (2014)  | Posthoc analysis of a clinical trial (NCT00730639)       | 14–52 months               | RECIST 1.0        | Persistent reduction in target lesions in the presence of new lesions, regression after initial PD <sup>b</sup>                                                                                                                                  | PD-SD/PR/CR on RECIST 1.0 | Melanoma | Nivolumab  | 107                   | 4 (3.7%)                 |
| Weber et al (2015)     | Randomized clinical trial (NCT01721746 [CheckMate 037])  | 8.4 months in median       | RECIST 1.1        | A greater than 30% reduction in the sum of the longest diameters of target lesions, consistent with an unconventional, immune-related response following PD                                                                                      | PD-PR/CR on RECIST 1.1    | Melanoma | Nivolumab  | 120                   | 10 (8.3%)                |
| Gettinger et al (2015) | Posthoc analysis of a clinical trial (NCT00730639)       | 39 months in median        | RECIST 1.0        | Persistent reduction in target lesions in the presence of new lesions, regression after following initial PD <sup>b</sup>                                                                                                                        | PD-SD/PR/CR on RECIST 1.0 | NSCLC    | Nivolumab  | 129                   | 6 (4.7%)                 |
| Borghaei et al (2015)  | Randomized clinical trial (NCT01673867 [CheckMate 057])  | 13.2 months in minimum     | RECIST 1.1        | <ul style="list-style-type: none"> <li>■ Appearance of a new lesion followed by decrease from baseline of at least 10% in sum of target lesions</li> <li>■ Initial increase from nadir <math>\geq</math> 20% in sum of target lesions</li> </ul> | PD-SD/PR/CR on RECIST 1.1 | NSCLC    | Nivolumab  | 287                   | 16 (5.6%)                |

|                      |                                                         |                                    |            |                                                                                                                                                                                                                                                                                                                                                                                                                                                               |                           |       |           |     |          |
|----------------------|---------------------------------------------------------|------------------------------------|------------|---------------------------------------------------------------------------------------------------------------------------------------------------------------------------------------------------------------------------------------------------------------------------------------------------------------------------------------------------------------------------------------------------------------------------------------------------------------|---------------------------|-------|-----------|-----|----------|
|                      |                                                         |                                    |            | <p>followed by reduction from baseline of at least 30%</p> <p>■ Initial increase from nadir <math>\geq</math> 20% in sum of target lesions or appearance of new lesion followed by at least 2 tumor assessments showing no further progression defined as 10% additional increase in sum of target lesions and new lesions</p>                                                                                                                                |                           |       |           |     |          |
| Brahmer et al (2015) | Randomized clinical trial (NCT01642004 [CheckMate 017]) | Approximately 11 months in minimum | RECIST 1.1 | <p>■ Appearance of a new lesion followed by decrease from baseline of at least 10% in sum of target lesions</p> <p>■ Initial increase from nadir <math>\geq</math> 20% in sum of target lesions followed by reduction from baseline of at least 30%</p> <p>■ Initial increase from nadir <math>\geq</math> 20% in sum of target lesions followed by at least 2 tumor assessments showing no further progression defined as 10% additional increase in sum</p> | PD-SD/PR/CR on RECIST 1.1 | NSCLC | Nivolumab | 131 | 9 (6.9%) |

|                        |                                                                  |                       |            |                                                                                                                                                                                                                                                                                                                                                                             |                           |          |               |     |           |
|------------------------|------------------------------------------------------------------|-----------------------|------------|-----------------------------------------------------------------------------------------------------------------------------------------------------------------------------------------------------------------------------------------------------------------------------------------------------------------------------------------------------------------------------|---------------------------|----------|---------------|-----|-----------|
|                        |                                                                  |                       |            | of target lesions and new lesions                                                                                                                                                                                                                                                                                                                                           |                           |          |               |     |           |
| Rizvi et al (2015)     | Clinical trial (NCT01721759 [CheckMate 063])                     | 11.0 months in median | RECIST 1.1 | Either a tumor burden reduction or no further progression for at least 2 tumor assessments after initial PD                                                                                                                                                                                                                                                                 | PD-SD/PR/CR on RECIST 1.1 | NSCLC    | Nivolumab     | 117 | 4 (3.4%)  |
| McDermott et al (2015) | Posthoc analysis of a clinical trial (NCT00730639)               | 45.2 months in median | RECIST 1.0 | Persistent reduction in target lesions in the presence of new lesions, regression following initial PD <sup>b</sup>                                                                                                                                                                                                                                                         | PD-SD/PR/CR on RECIST 1.0 | RCC      | Nivolumab     | 34  | 3 (8.8%)  |
| Hodi et al (2016)      | Posthoc analysis of a clinical trial (NCT01295827 [KEYNOTE-001]) | 15 months in median   | irRC       | ≥ 25% increase in tumor burden not confirmed as irRC-defined PD at next assessment                                                                                                                                                                                                                                                                                          | PD-irSD/PR/CR on irRC     | Melanoma | Pembrolizumab | 327 | 24 (7.3%) |
| George et al (2016)    | Subgroup analysis of a clinical trial (NCT01354431)              | NA                    | RECIST 1.1 | ≥30% decrease in the sum of diameters of target lesions and all new measurable lesions, taking as reference the baseline sum diameters, or neither sufficient shrinkage to qualify for immune-related partial response nor sufficient increase to qualify for immune-related progressive disease, taking as reference the smallest sum diameters during study participation | PD-PR/CR on RECIST 1.1    | RCC      | Nivolumab     | 168 | 12 (7.1%) |
| Sharma et al (2016)    | Clinical trial (NCT01928394 [CheckMate 032])                     | 15.2 months in median | RECIST 1.1 | ■ Appearance of a new lesion followed by decrease from baseline of at least 10% in the                                                                                                                                                                                                                                                                                      | PD-SD/PR/CR on RECIST 1.1 | UCC      | Nivolumab     | 78  | 9 (11.5%) |

|                        |                                                                                                                  |                       |            | sum of the target lesions                                                                                                                                                                                                                                                                                                                                                                                                                          |                        |                       |               |     |                        |
|------------------------|------------------------------------------------------------------------------------------------------------------|-----------------------|------------|----------------------------------------------------------------------------------------------------------------------------------------------------------------------------------------------------------------------------------------------------------------------------------------------------------------------------------------------------------------------------------------------------------------------------------------------------|------------------------|-----------------------|---------------|-----|------------------------|
|                        |                                                                                                                  |                       |            | <ul style="list-style-type: none"> <li>■ Initial increase from nadir <math>\geq 20\%</math> in the sum of the target lesions followed by reduction from baseline of at least 30%</li> <li>■ Initial increase from nadir <math>\geq 20\%</math> in the sum of the target lesions followed by at least two tumor assessments showing no further progression defined as a 10% additional increase in sum of target lesions and new lesions</li> </ul> |                        |                       |               |     |                        |
| Rosenberg et al (2016) | Clinical trial (NCT 02108652)                                                                                    |                       | RECIST 1.1 | Target lesion reduction of at least 30% from their baseline scans                                                                                                                                                                                                                                                                                                                                                                                  | PD-PR/CR on RECIST 1.1 | UCC                   | Atezolimumab  | 310 | 21 (6.8%)              |
| Seiwert et al (2016)   | Clinical trial (NCT01848834 [KEYNOTE-012])                                                                       | NA                    | RECIST 1.1 | RECIST 1.1-defined PD followed by RECIST 1.1-defined CR <sup>c</sup>                                                                                                                                                                                                                                                                                                                                                                               | PD-PR/CR on RECIST 1.1 | SqCC of head and neck | Pembrolizumab | 45  | 1 (2.2%) <sup>d</sup>  |
| Long et al (2017)      | Posthoc analysis of two randomized clinical trials (NCT01721772 [CheckMate 066] and NCT01844505 [CheckMate 067]) | 14.3 months in median | RECIST 1.1 | Greater than 30% tumor reduction in target lesion after progression when compared with baseline                                                                                                                                                                                                                                                                                                                                                    | PD-PR/CR on RECIST 1.1 | Melanoma              | Nivolumab     | 526 | 24 (4.6%)              |
| Escudier et al (2017)  | Subgroup analysis of a randomized clinical trial (NCT01668784 [CheckMate 025])                                   | 8.8 months in median  | RECIST 1.1 | $\geq 30\%$ decrease of tumor burden during treatment beyond progression                                                                                                                                                                                                                                                                                                                                                                           | PD-PR/CR on RECIST 1.1 | Renal cell carcinoma  | Nivolumab     | 406 | 20 (4.9%) <sup>e</sup> |
| Sharma et al (2017)    | Clinical trial (NCT02387996)                                                                                     | 7.0 months in median  | RECIST 1.1 | ■ Appearance of a new lesion                                                                                                                                                                                                                                                                                                                                                                                                                       | PD-SD/PR/CR on RECIST  | Urothelial cell       | Nivolumab     | 265 | 24 (9.1%)              |

|                               |                                          |                       |      |                                                                                                                                                                                                                                                                                                                                                                                                                                                                                                |                       |           |                                                                               |     |          |
|-------------------------------|------------------------------------------|-----------------------|------|------------------------------------------------------------------------------------------------------------------------------------------------------------------------------------------------------------------------------------------------------------------------------------------------------------------------------------------------------------------------------------------------------------------------------------------------------------------------------------------------|-----------------------|-----------|-------------------------------------------------------------------------------|-----|----------|
|                               | [CheckMate 275]                          |                       |      | <p>followed by decrease from baseline of at least 10% in the sum of the target lesions</p> <p>■ Initial increase from nadir <math>\geq</math> 20% in the sum of the target lesions followed by reduction from baseline of at least 30%</p> <p>■ Initial increase from nadir <math>\geq</math> 20% in the sum of the target lesions followed by at least two tumor assessments showing no further progression defined as a 10% additional increase in sum of target lesions and new lesions</p> | 1.1                   | carcinoma |                                                                               |     |          |
| Lee et al (2018) <sup>f</sup> | Posthoc analysis of a prospective cohort | 19.3 months in median | irRC | $\geq$ 25% increase in tumor burden not confirmed as irRC-defined PD at next assessment                                                                                                                                                                                                                                                                                                                                                                                                        | PD-irSD/PR/CR on irRC | Melanoma  | PD-1 inhibitor (nivolumab or pembrolizumab)                                   | 125 | 6 (4.8%) |
|                               |                                          |                       |      |                                                                                                                                                                                                                                                                                                                                                                                                                                                                                                |                       |           | PD-1 inhibitor (nivolumab or pembrolizumab) and CTLA-4 inhibitor (ipilimumab) |     | 3 (2.4%) |

Abbreviations: CR = complete response, CTLA-4 = cytotoxic T-lymphocyte-associated protein 4, irRC = immune-related response criteria, NA = not available, NCT = national clinical trial, NSCLC = non-small cell lung cancer, PD = progressive disease, PD-1 = programmed cell death protein 1, PR = partial response, PsP = pseudoprogression, RECIST = response evaluation criteria in solid tumor, RCC = renal cell carcinoma, SD = stable disease, SqCC = squamous cell carcinoma, UCC = urothelial cell carcinoma, WHO = World Health Organization.

\*All patients had locally advanced, metastatic, or recurrent tumor(s).

<sup>a</sup>Include 17 patients with irSD and 5 patients with irPR.

<sup>b</sup>Further detail of persistent reduction and regression was not provided.

<sup>c</sup>There was only one patient showed pseudoprogression, and the response pattern shown by the patient is described.

<sup>d</sup>Only one patient with CR.

<sup>e</sup>All 20 patients with PR.

<sup>f</sup>Separate data extraction was available according to the agent (PD-1 inhibitor only and PD-1 inhibitor with CTLA-4 inhibitor).
